# Supplementary material
Source: PubMed Central journal article supplement (PMC5334262)
Supplement: NIHMS830916-supplement-1.pdf [file NIHMS830916-supplement-1.pdf]

## Supplementary data

The supplementary file contains 2 figures (Fig S1 and S2) and 1 table (Table S1).

Fig S1: Similar level of total STAT1/3 and similar level of basal pSTAT1/3 were found in CD4 naïve T cells from healthy donors and BC patients, suggesting that the observed defective IL-6 signaling responses were not caused by lower level of total STAT1/3 or basal pSTAT1/3 in BC patients.

Fig S2: Among relapsed BC patients, similar IL-6 signaling responses were found at diagnosis and at relapsed, indicating that impaired IL-6 signaling responses persistent through progression. In relapsed patients who went on to achieve remission, there was a trend towards higher IL-6 signaling in some patients.

Fig S3: Lower IL-6 signaling response in peripheral CD4<sup>+</sup> naïve T cells from melanoma (Mel), gastrointestinal (GI) and lung cancer (LC) patients.

Table S1: No significant associations were found between IL-6 signaling response and clinicopathologic characteristics (age, tumor grade, T status or subtype) of BC patients.

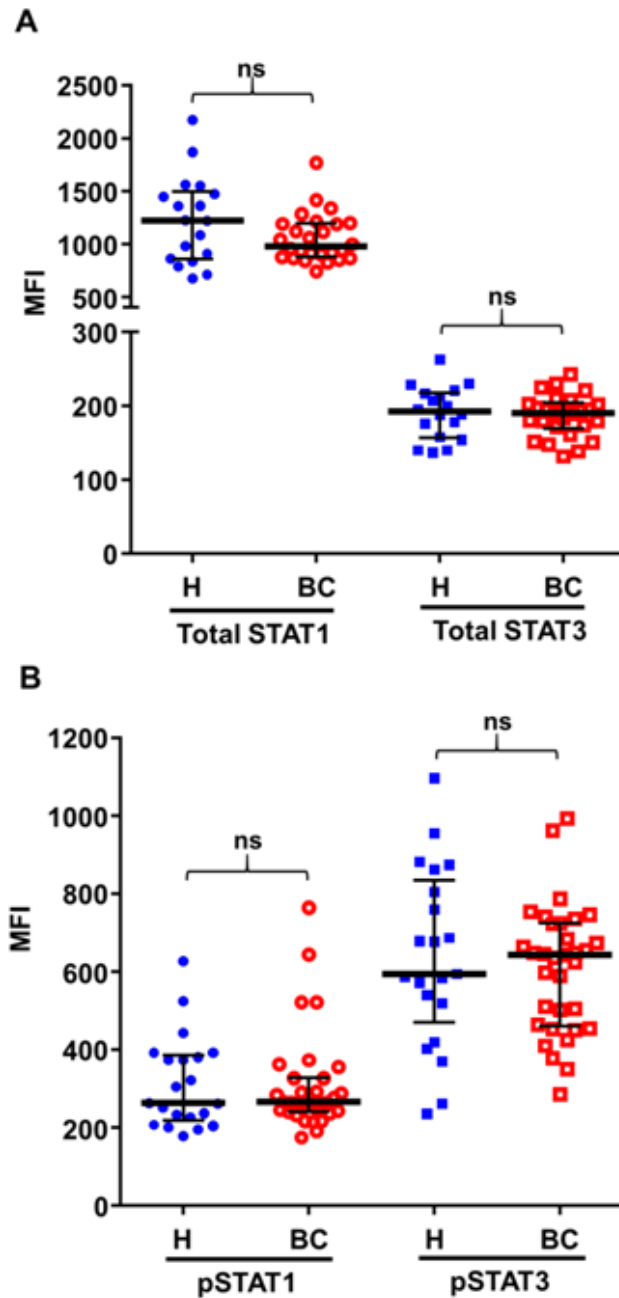

**Figures S1. Impaired IL-6 signaling responses in CD4<sup>+</sup> naïve T cells is not due to levels of total STATs or basal pSTATs.** (A) The expression levels of total intracellular STAT1 and STAT3 in unstimulated naïve CD4 T cells from healthy donors (n=18) and BC patients (n=26) were determined by flow cytometry. (B) Basal levels of phosphorylated STAT1 and STAT3 in unstimulated naïve CD4 T cells from healthy donors (n=21) and BC patients (n=33) were determined by phosphoflow cytometry with anti-pSTAT1(pY701) and anti-pSTAT3(pY705) antibodies. Unpaired t test. ns=not significant.

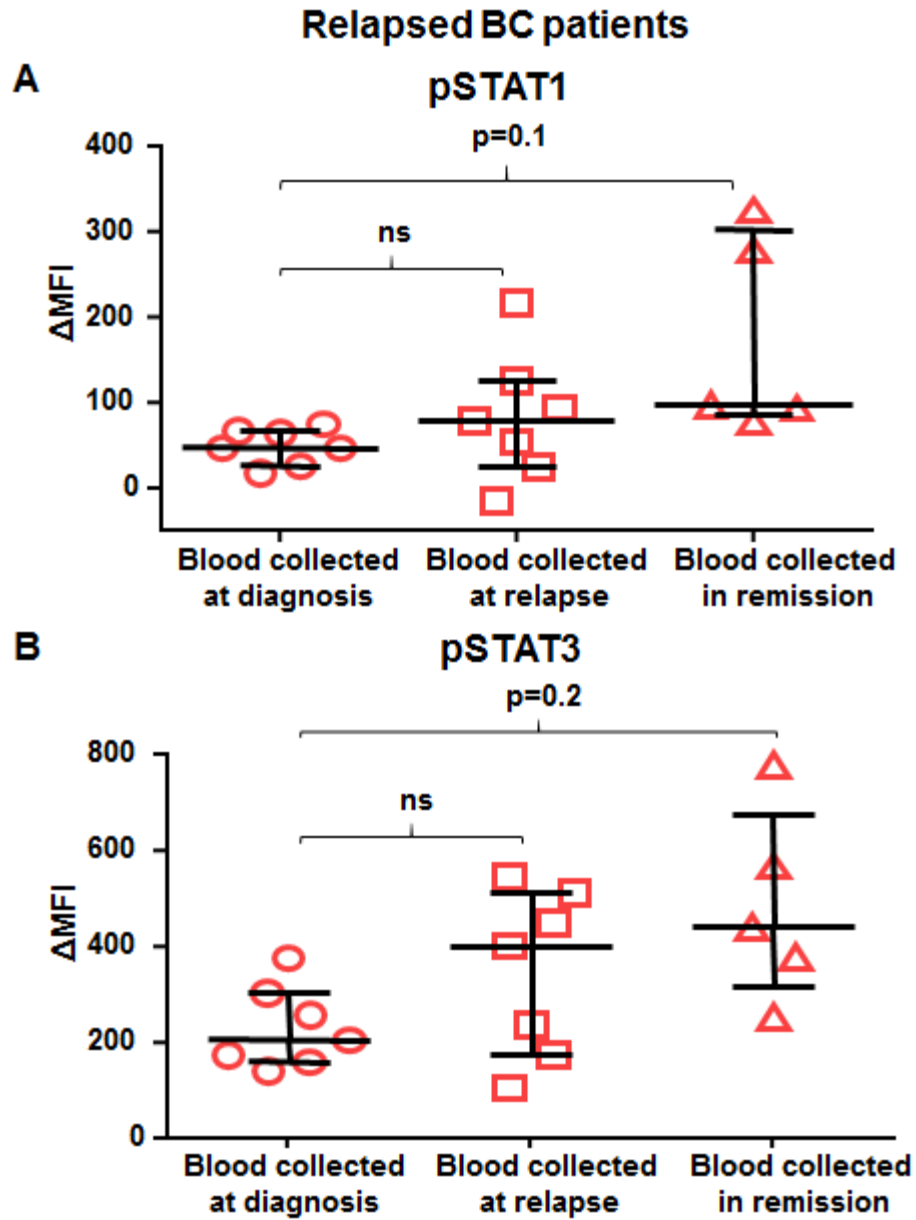

**Figure S2. IL-6 signaling responses in relapsed patients.** Among relapsed BC patients, IL-6 induced phosphorylation of STAT1 (A) and STAT3 (B) in naïve CD4<sup>+</sup> T cells were analyzed from blood collected at diagnosis (n=7), at time of relapse (n=7), or in remission after relapse (n=5). One way ANOVA. ns=not significant.

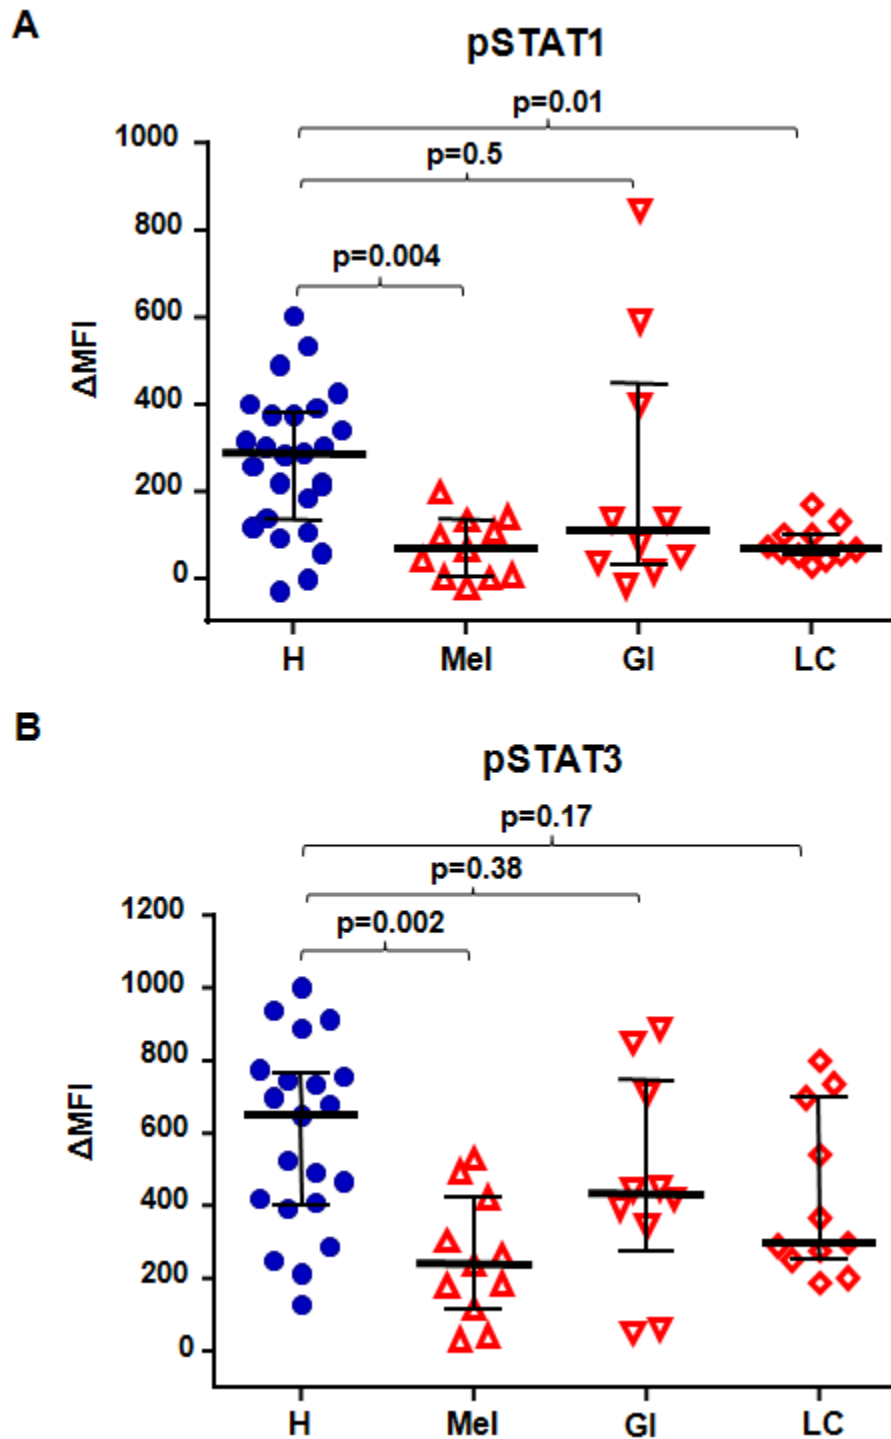

**Figure S3. Lower IL-6 signaling responses in melanoma, gastrointestinal and lung cancer patients.** IL-6 induced phosphorylation of STAT1 (A) and STAT3 (B) in peripheral naïve CD4<sup>+</sup> T cells were compared between melanoma (Mel) (n=11), gastrointestinal (GI) (n=10) and lung cancer (LC) (n=11) patients and age-matched healthy donors (n=26).

**Table S1. Correlation between IL-6 signaling response and clinicopathological characteristics**

| Variables    | pSTAT1       | pSTAT3       |
|--------------|--------------|--------------|
|              | r (p-value)  | r (p-value)  |
| Age          | 0.13 (0.34)  | 0.05 (0.72)  |
| Tumor stage  | -0.13 (0.38) | -0.01 (0.99) |
| Grade        | -0.03 (0.82) | 0.1 (0.45)   |
| Nodal status | -0.02 (0.89) | 0.07 (0.62)  |
| Subtype      | (0.98)       | (0.89)       |

Note: Correlations tested by Pearson's Correlation Coefficient
